# Supplementary material
Source: publisher figshare collection journal article supplement (https://frontiersin.figshare.com/ndownloader/files/15606338)

**Supplementary Figure 1.** Visual inspection of the Markov chains (Secul= Sensitivity of the bacteriological culture; Spcul= Specificity of the bacteriological culture; Sepcr= Sensitivity of the PCR; Sppcr= Specificity of the PCR; pi= prevalence of *M.bovis* on bTB-like lesions).

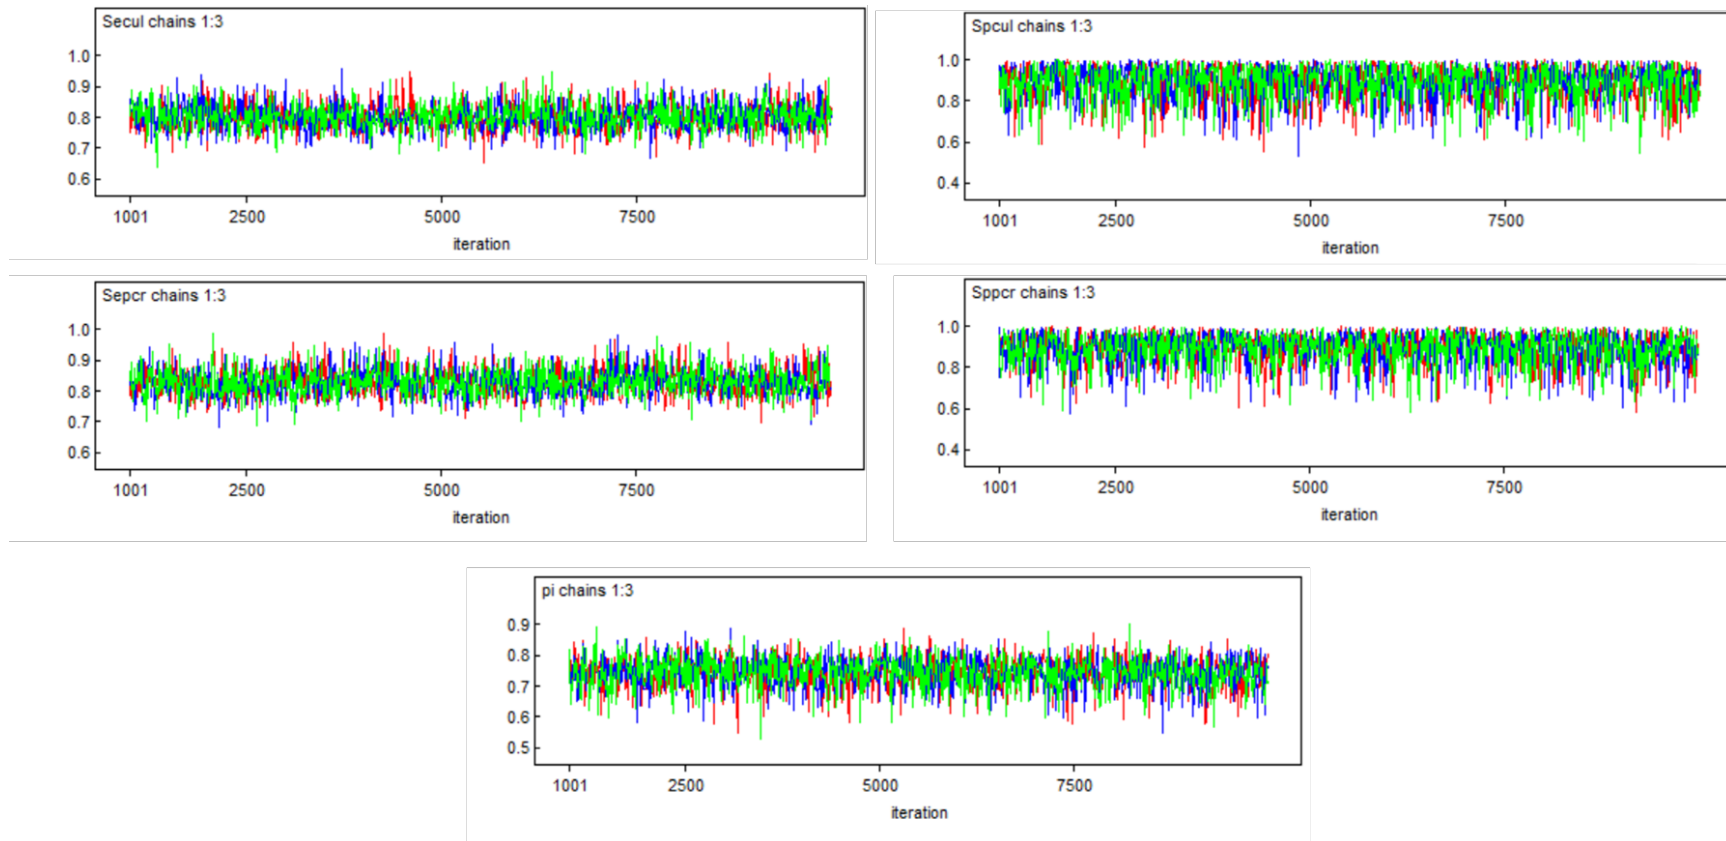

Supplement: Supplementary file [file 15606338]
